# Supplementary material for: Physico-chemical properties of functionally adhesive spider silk nanofibres
Source: Royal Society of Chemistry journal article supplement (doi:10.1039/d2bm01599d), 2023-01-01
Supplement: d2bm01599d1.pdf [file d2bm01599d1.pdf]

## Supporting Information

### Physico-chemical properties of functionally adhesive spider silk nanofibres

Anna-Christin Joel<sup>1,2,3\*</sup>, Aditya Rawal<sup>4</sup>, Yin Yao<sup>4</sup>, Andrew Jenner<sup>4</sup>, Nicholas Ariotti<sup>4,5</sup>, Margret Weissbach<sup>3</sup>, Lewis Adler<sup>4</sup>, Jay Stafstrom<sup>2,6</sup>, Sean J. Blamires<sup>2,4,7</sup>

1: Department of Biological Sciences, Macquarie University, Sydney, Australia

2: School of Biological, Earth and Environmental Sciences, The University of New South Wales, Sydney, Australia

3: Institute of Zoology, RWTH Aachen University, Aachen, Germany

4: Mark Wainwright Analytical Centre, University of New South Wales, Sydney, Australia

5: Institute for Molecular Bioscience, The University of Queensland, Brisbane, Australia

6: Department of Neurobiology and Behavior, Cornell University, Ithaca, New York, U.S.A.

7: School of Mechanical and Mechatronic Engineering, University of Technology, Sydney, Australia

\*: correspondence to [joel@bio2.rwth-aachen.de](mailto:joel@bio2.rwth-aachen.de)

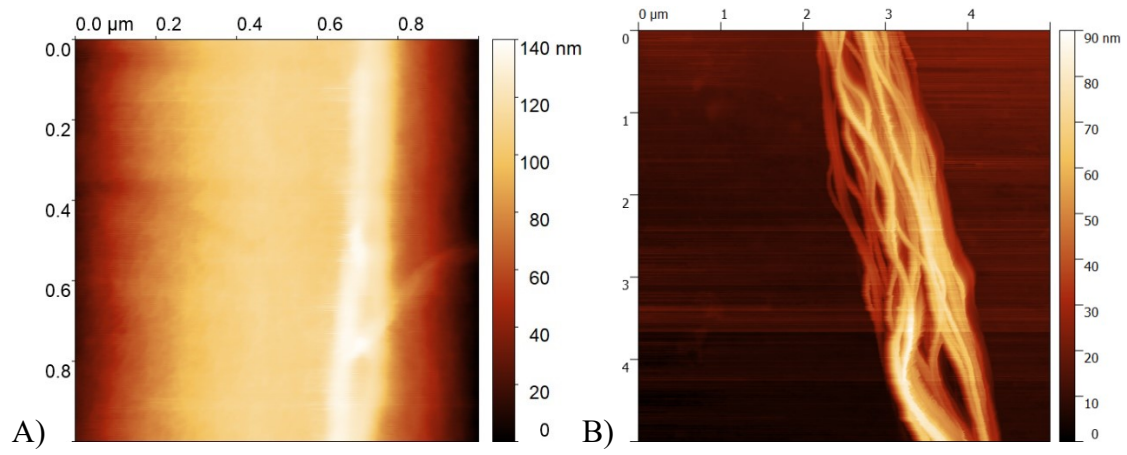

Figure S1: A) *Badumna longinqua* silk analyzed by AFM with an OTESPA tip B) *Deinopis subrufa* silk analyzed by AFM with a ScanAsyst tip.

Tab. S1: Data of GC-MS analysis. BSA: bovine serum albumin (control)

| Amino Acid [%]    | <i>D. subrufa</i> cribellate silk | <i>B. longinqua</i> cribellate silk | <i>N. plumipes</i> MA silk | <i>U. plumipes</i> cribellate silk | <i>U. plumipes</i> MA silk | BSA (1) | BSA (2) | BSA (3) | BSA (4) |
|-------------------|-----------------------------------|-------------------------------------|----------------------------|------------------------------------|----------------------------|---------|---------|---------|---------|
| alanine           | 18.5                              | 13.6                                | 29.9                       | 24.1                               | 22.6                       | 7.6     | 7.2     | 7.1     | 6.7     |
| glycine           | 13.7                              | 8.3                                 | 17.6                       | 5.7                                | 16.1                       | 1.7     | 1.5     | 1.4     | 1.2     |
| valine            | 0.9                               | 4.0                                 | 0.8                        | 4.9                                | 2.7                        | 5.9     | 6.5     | 6.4     | 6.0     |
| leucine           | 0.4                               | 2.5                                 | 1.9                        | 3.4                                | 3.9                        | 8.9     | 10.9    | 10.8    | 10.0    |
| isoleucine        | 0.5                               | 4.2                                 | 0.4                        | 4.1                                | 1.5                        | 1.9     | 2.2     | 2.1     | 2.0     |
| proline           | 1.1                               | 1.8                                 | 1.2                        | 2.0                                | 7.8                        | 3.5     | 5.8     | 6.0     | 5.9     |
| methionine        | 0.3                               | 0.5                                 | 0.2                        | 0.2                                | 0.6                        | 0.7     | 0.5     | 0.5     | 0.5     |
| serine            | 10.0                              | 29.3                                | 6.8                        | 25.8                               | 15.4                       | 4.3     | 3.0     | 3.5     | 3.9     |
| threonine         | 2.4                               | 5.5                                 | 1.5                        | 1.2                                | 0.6                        | 4.9     | 3.1     | 5.6     | 7.0     |
| phenylalanine     | 0.5                               | 2.4                                 | 0.6                        | 2.0                                | 0.4                        | 3.8     | 3.4     | 3.2     | 3.0     |
| aspartic acid     | 3.0                               | 6.1                                 | 2.4                        | 6.0                                | 2.8                        | 11.7    | 13.9    | 13.1    | 12.4    |
| t-hydroxy-proline | 1.0                               | 0.3                                 | 0.1                        | 2.4                                | 0.6                        | ND      | ND      | ND      | ND      |

|               |      |      |      |      |      |      |      |      |      |
|---------------|------|------|------|------|------|------|------|------|------|
| cysteine      | 0.0  | 0.0  | 0.0  | 0.0  | 0.0  | 0.1  | 0.2  | 0.7  | 1.2  |
| glutamic acid | 35.8 | 16.4 | 19.0 | 13.4 | 13.5 | 16.2 | 15.2 | 14.2 | 13.0 |
| asparagine    | 0.0  | 0.0  | 0.0  | 0.1  | 0.1  | 0.0  | 0.2  | 0.2  | 0.2  |
| lysine        | 1.5  | 1.6  | 0.3  | 1.1  | 0.4  | 12.1 | 10.7 | 10.1 | 11.6 |
| glutamine     | 0.0  | 0.0  | 0.0  | 0.0  | 0.0  | 0.0  | 0.0  | 0.0  | 0.0  |
| Arginine      | 2.0  | 0.7  | 4.1  | 1.4  | 1.4  | 3.7  | 2.4  | 3.1  | 2.5  |
| histidine     | 0.2  | 0.0  | 0.0  | 0.5  | 0.1  | 3.5  | 1.9  | 1.9  | 2.1  |
| p-Tyr         | 8.3  | 2.6  | 13.1 | 1.5  | 9.1  | 5.2  | 4.5  | 4.2  | 4.8  |
| tryptophan    | 0.0  | 0.0  | 0.0  | 0.2  | 0.4  | 0.2  | 0.3  | 0.0  | 0.2  |
| cystine       | 0.0  | 0.0  | 0.0  | 0.0  | 0.1  | 3.9  | 6.5  | 5.9  | 5.6  |
